# Supplementary material
Source: Elsevier journal article supplement (https://www.sciencedirect.com/science/article/pii/S0213005X15001536)
Supplement: mmc1 [file S0213005X15001536:mmc1.docx]

**Tabla 3. Prevalencia y asociación de los marcadores genéticos relacionados con la lenta progresión, distribuidos en los diferentes subgrupos de pacientes categorizados en base a la progresión de la infección por VIH-1.**

|  | **LTNP** | | | | | **Progresores** |
| --- | --- | --- | --- | --- | --- | --- |
|  | Todos | Controladores de la carga viral | | | LTNP-NC | Todos |
|  | (N=46) | Todos (N=17) | LTNP-EC (N=9) | LTNP-CV (N=8) | N=29 | (N=354) |
| HLA-B*57:01 SNP: rs2395029 | | | | | | |
| **HLA-B*57:01 positivo:** | 11 (24%) | 6 (35%) | 3 (33%) | 3 (38%) | 5 (17%) | 20 (6%) |
| (+) HLA-C (C/C)) | 4 (36%) | 3 (50%) | 3 (100%) | 0 (0%) | 1 (20%) | 2 (10%) |
| (+) CCR5wt/Δ32 | 2 (18%) | 2 (33%) | 1 (33%) | 1 (33%) | 0 (0%) | 2 (10%) |
| **HLA-B*57:01 negativo:** | 35 (76%) | 11 (65%) | 6 (67%) | 5 (63%) | 24 (83%) | 334 (94%) |
| (+) HLA-C (C/C) | 14 (40%) | 5 (46%) | 3 (50%) | 2 (40%) | 9 (38%) | 52 (16%) |
| (+) CCR5wt/Δ32 | 9 (26%) | 2 (18%) | 1 (17%) | 1 (20%) | 7 (29%) | 33 (10%) |
| Homocigosis (C/C) para el SNP: rs9264942 del HLA-C | | | | | | |
| **HLA-C (C/C) positivo:** | 18 (39%) | 8 (47%) | 6 (67%) | 2 (25%) | 10 (35%) | 54 (15%) |
| (+) HLA-B*57:01 | 4 (22%) | 3 (38%) | 3 (50%) | 0 (0%) | 1 (10%) | 2 (4%) |
| (+) CCR5wt/Δ32 | 7 (39%) | 3 (38%) | 2 (33%) | 1 (50%) | 4 (40%) | 2 (4%) |
| **HLA-C (C/C) negativo:** | 28 (61%) | 9 (53%) | 3 (33%) | 6 (75%) | 19 (66%) | 300 (85%) |
| (+) HLA-B*57:01 | 7 (25%) | 3 (33%) | 0 (0%) | 3 (50%) | 4 (21%) | 18 (6%) |
| (+) CCR5wt/Δ32 | 4 (14%) | 3 (33%) | 0 (0%) | 1 (50%) | 3 (16%) | 33 (11%) |
| Deleción CCR5wt/Δ32 | | | | | | |
| **CCR5wt/Δ32 positivo:** | 11 (24%) | 4 (24%) | 2 (22%) | 2 (25%) | 7 (24%) | 35 (10%) |
| (+) HLA-B*57:01 | 2 (18%) | 2 (50%) | 1 (50%) | 1 (50%) | 0 (0%) | 2 (6%) |
| (+) HLA-C (C/C) | 7 (24%) | 3 (75%) | 2 (100%) | 1 (50%) | 4 (57%) | 2 (6%) |
| **CCR5wt/Δ32 negativo:** | 35 (76%) | 13 (77%) | 7 (78%) | 6 (75%) | 22 (76%) | 319 (90%) |
| (+) HLA-B*57:01 | 9 (26%) | 4 (31%) | 2 (29%) | 2 (33%) | 5 (23%) | 18 (6%) |
| (+) HLA-C (C/C) | 11 (31%) | 5 (39%) | 4 (67%) | 1 (17%) | 6 (27%) | 52 (16%) |

LTNP: lentos progresores a largo plazo; LTNP-EC: controladores élite; LTNP-CV: controladores de viremia; LTNP-NC: no controladores de viremia.
